# Supplementary material for: Distinct spatial landscapes in clear-cell renal cell carcinoma as revealed by whole transcriptome analysis
Source: PubMed Central journal article supplement — Immunooncol Technol. 2023 Nov 22;21:100690. doi: 10.1016/j.iotech.2023.100690 (PMC10825646; doi:10.1016/j.iotech.2023.100690), 2023-11-22

# SUPPLEMENTARY FIGURE 1, REPRESENTATIVE IMAGES

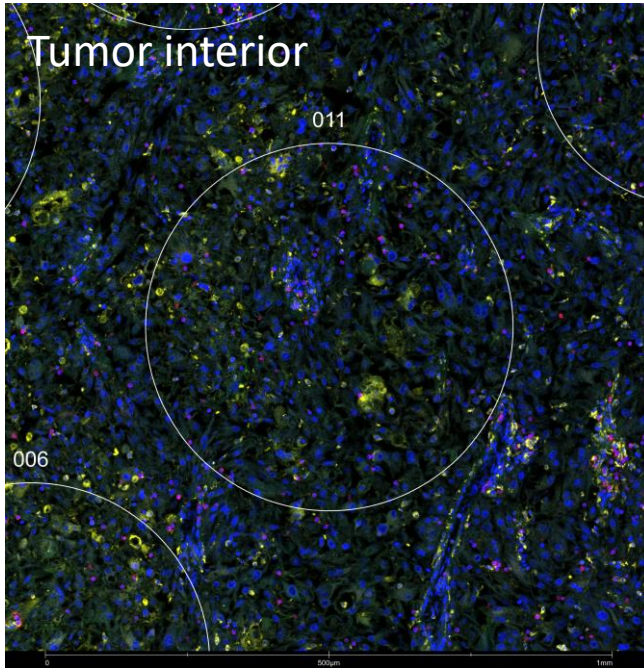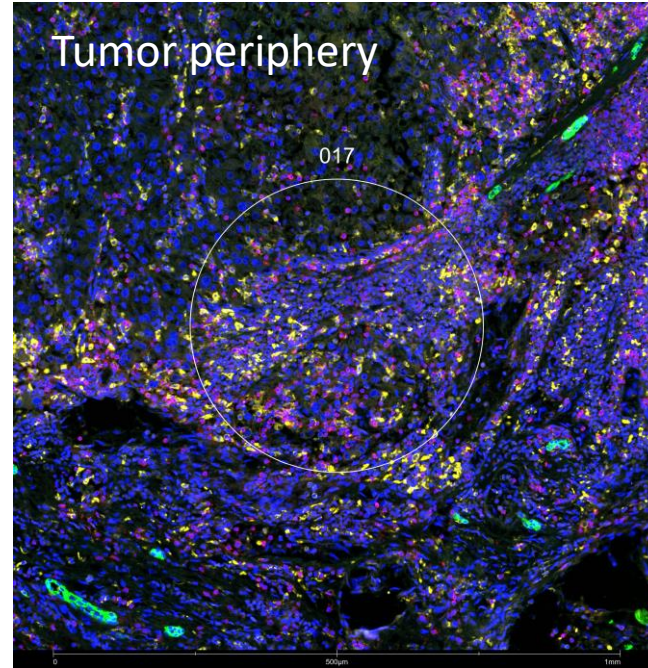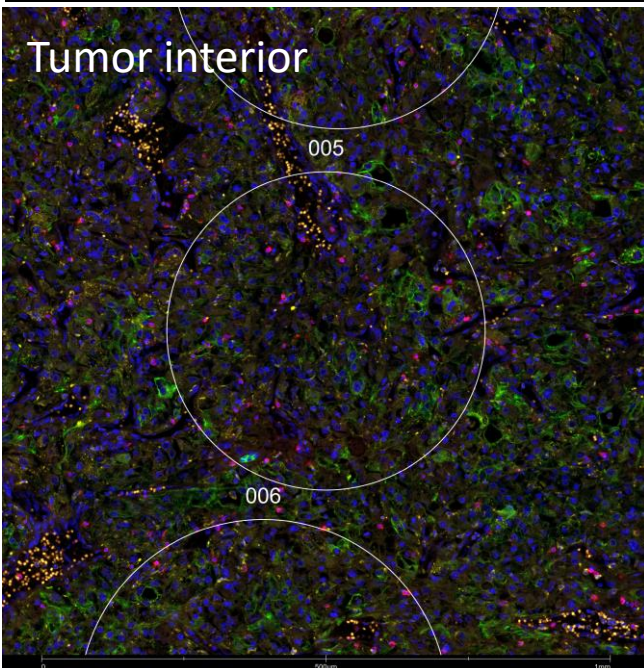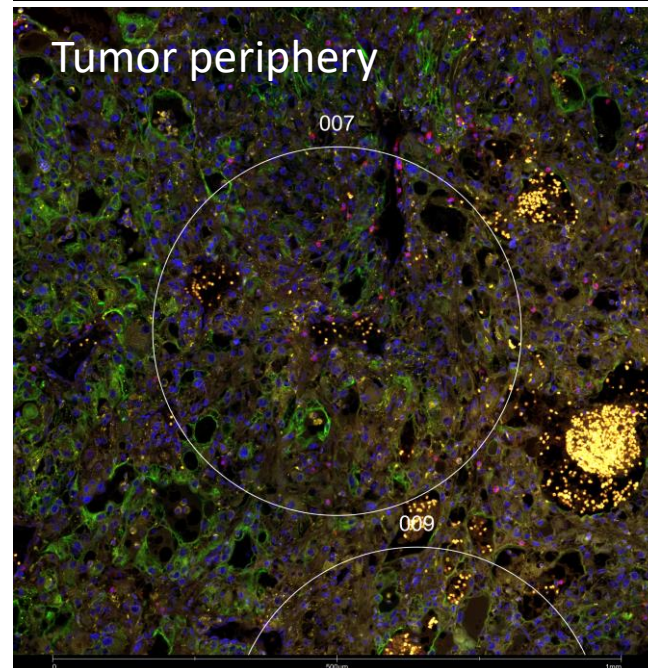

# SUPPLEMENTARY FIGURE 2, ASSAY QUALITY CONTROL

A)

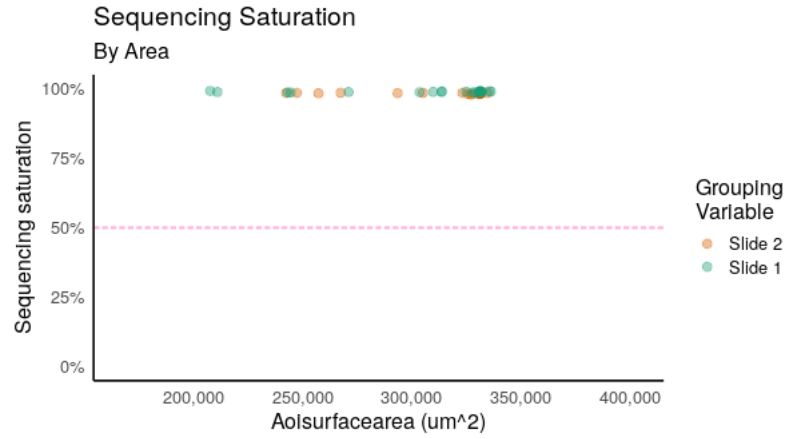

B)

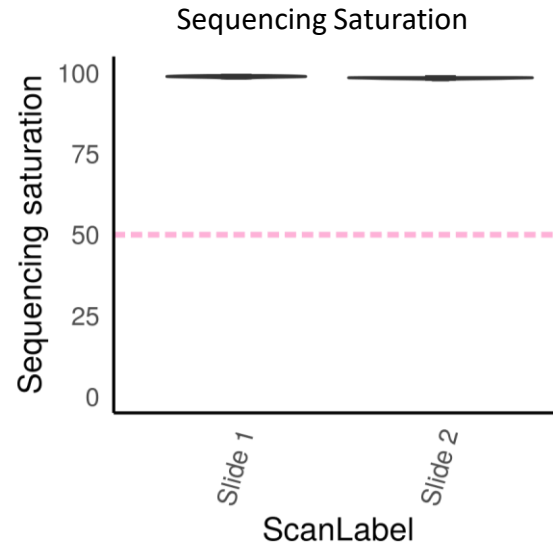

C)

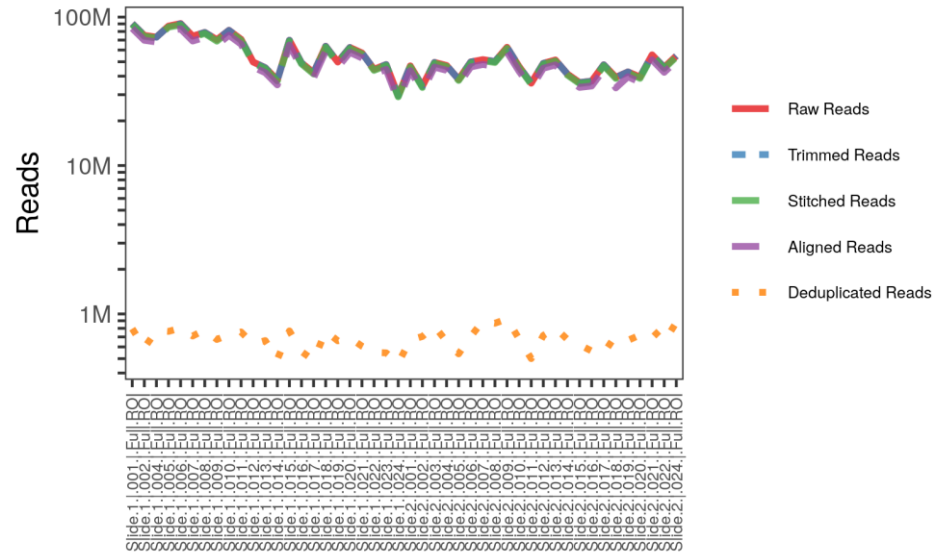

D)

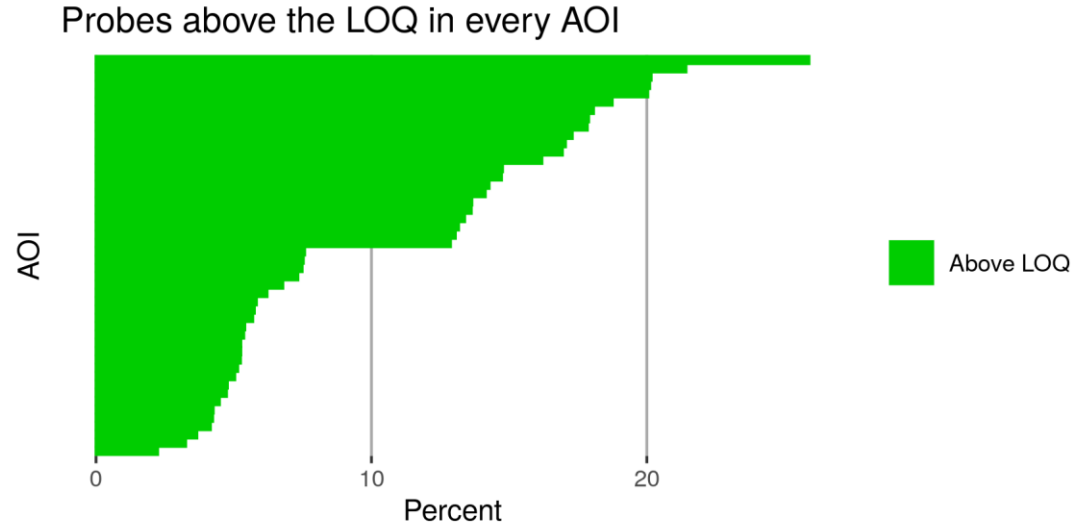

# SUPPLEMENTARY FIGURE 3, NORMALIZATION

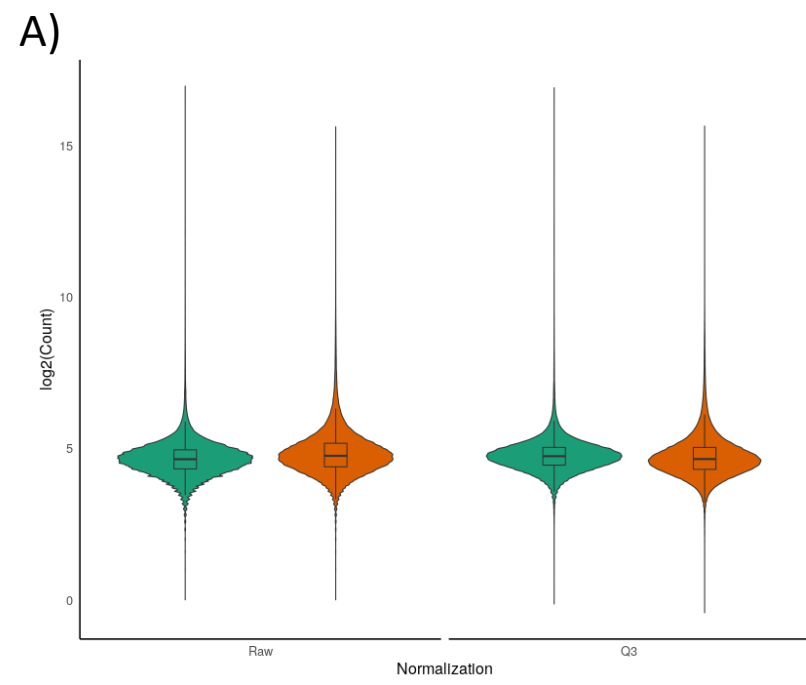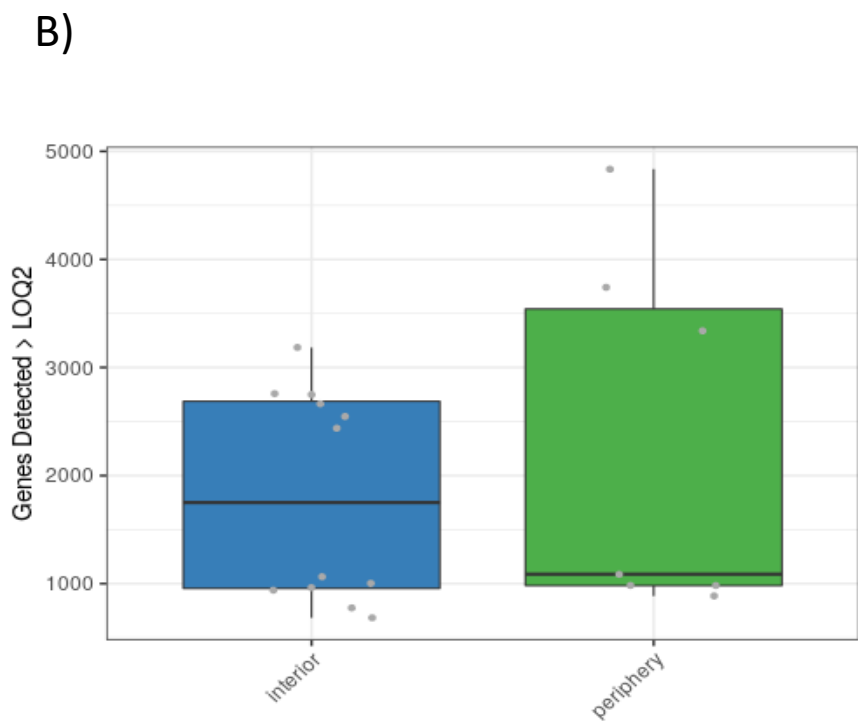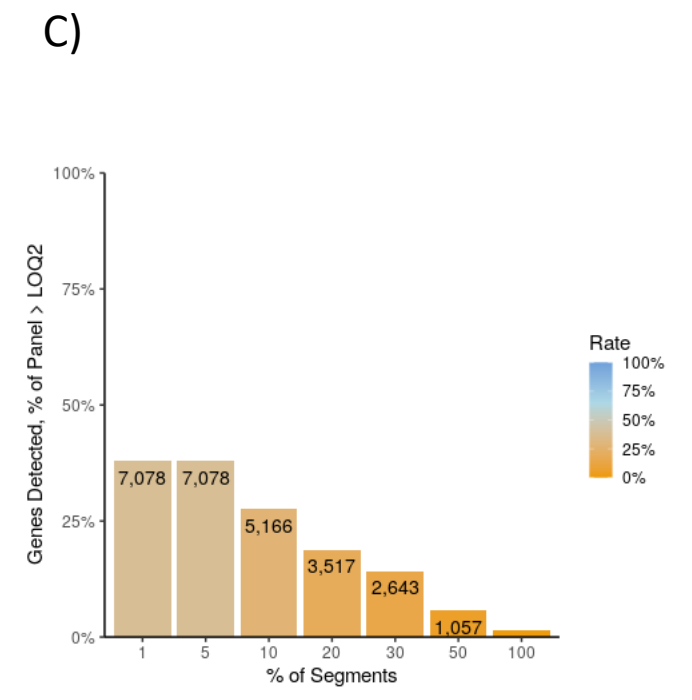

Supplement: mmc1.pdf [file mmc1.pdf]
